# Supplementary material for: Generation of reactive cobalt oxo oxamate radical species for biomimetic oxidation of contaminants
Source: Royal Society of Chemistry journal article supplement (doi:10.1039/c7ra08317c), 2017-01-01
Supplement: c7ra08317c1.pdf [file c7ra08317c1.pdf]

**Electronic Supplementary Information For**

**Generation of reactive cobalt oxo oxamate radical species for  
biomimetic oxidation of contaminants**

Nan Li,\* Yun Zheng, Xuemei Jiang, Ran Zhang and Wenxing Chen\*

National Engineering Lab for Textile Fiber Materials & Processing Technology

(Zhejiang), Zhejiang Sci-Tech University, Hangzhou 310018, China

**Corresponding Author**

\*E-mail:linan @zstu.edu.cn, Phone: +86 571 86843611; Fax: +86 571 86843611.

\*E-mail:wxchen@zstu.edu.cn, Phone: +86 571 86843611; Fax: +86 571 86843611.

**Table S1.** High-resolution parent and fragment ion data for complex 1.

|                                                                                                                                                                                                                                                                           |                                                                                                                                                                                                                                                                  |                                                                                                                                                                                                                                                                            |
|---------------------------------------------------------------------------------------------------------------------------------------------------------------------------------------------------------------------------------------------------------------------------|------------------------------------------------------------------------------------------------------------------------------------------------------------------------------------------------------------------------------------------------------------------|----------------------------------------------------------------------------------------------------------------------------------------------------------------------------------------------------------------------------------------------------------------------------|
| <b>306.9402</b> $^{-}$ ( $+0\text{H}$ )<br>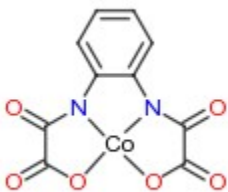<br><b>306.9401</b> ( $+0.1\text{.mDa}$ )<br>$\text{C}_{10}\text{H}_4\text{N}_2\text{O}_6\text{Co}$ (-none)                                   | <b>262.9504</b> $^{-}$ ( $+0\text{H}$ )<br><br><b>262.9503</b> ( $+0.1\text{.mDa}$ )<br>(S:4.0, B:2)<br>$\text{C}_9\text{H}_4\text{N}_2\text{O}_4\text{Co}$ ( $-\text{CO}_2$ )  | <b>252.9663</b> $^{-}$ ( $+2\text{H}$ )<br><br><b>252.9660</b> ( $+0.3\text{.mDa}$ )<br>(S:2.0, B:2)<br>$\text{C}_8\text{H}_6\text{N}_2\text{O}_4\text{Co}$ ( $-\text{C}_2\text{O}_2$ ) |
| <b>234.9559</b> $^{-}$ ( $+0\text{H}$ )<br><br><b>234.9554</b> ( $+0.5\text{.mDa}$ )<br>(S:3.0, B:2)<br>$\text{C}_8\text{H}_4\text{N}_2\text{O}_3\text{Co}$ ( $-\text{C}_2\text{O}_3$ ) | <b>190.9657</b> $^{-}$ ( $+0\text{H}$ )<br><br><b>190.9656</b> ( $+0.1\text{.mDa}$ )<br>(S:9.5, B:4)<br>$\text{C}_7\text{H}_4\text{N}_2\text{OCo}$ ( $-\text{C}_3\text{O}_5$ ) | <b>132.0327</b> $^{-}$ ( $+0\text{H}$ )<br><br><b>132.0324</b> ( $+0.3\text{.mDa}$ )<br>(S:12.0, B:4)<br>$\text{C}_7\text{H}_4\text{N}_2\text{O}$ ( $-\text{C}_3\text{O}_5\text{Co}$ ) |

**Table S2.** High-resolution parent and fragment ion data for complex 2.

|                                                                                                                                                                                                                                                                              |                                                                                                                                                                                                                                                                              |                                                                                                                                                                                                                                                                                |
|------------------------------------------------------------------------------------------------------------------------------------------------------------------------------------------------------------------------------------------------------------------------------|------------------------------------------------------------------------------------------------------------------------------------------------------------------------------------------------------------------------------------------------------------------------------|--------------------------------------------------------------------------------------------------------------------------------------------------------------------------------------------------------------------------------------------------------------------------------|
| <p><b>351.9253</b>    <math>\neg</math>- (+0H)</p> 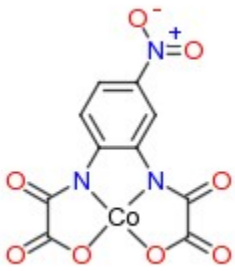 <p>351.9252 (+0.1.mDa)<br/>C<sub>10</sub>H<sub>3</sub>N<sub>3</sub>O<sub>8</sub>Co (-none)</p>                                          | <p><b>279.9409</b>    <math>\neg</math>- (+0H)</p>  <p>279.9405 (+0.4.mDa)<br/>(S:3.0, B:3)<br/>C<sub>8</sub>H<sub>3</sub>N<sub>3</sub>O<sub>5</sub>Co (-C<sub>2</sub>O<sub>3</sub>)</p>    | <p><b>279.9409</b>    <math>\neg</math>- (+0H)</p>  <p>279.9405 (+0.4.mDa)<br/>(S:3.0, B:2)<br/>C<sub>8</sub>H<sub>3</sub>N<sub>3</sub>O<sub>5</sub>Co (-C<sub>2</sub>O<sub>3</sub>)</p>    |
| <p><b>279.9409</b>    <math>\neg</math>- (+0H)</p>  <p>279.9405 (+0.4.mDa)<br/>(S:4.0, B:3)<br/>C<sub>8</sub>H<sub>3</sub>N<sub>3</sub>O<sub>5</sub>Co (-C<sub>2</sub>O<sub>3</sub>)</p>   | <p><b>252.9543</b>    <math>\neg</math>- (+1H)</p>  <p>252.9534 (+0.9.mDa)<br/>(S:6.0, B:4)<br/>C<sub>7</sub>H<sub>4</sub>N<sub>3</sub>O<sub>4</sub>Co (-C<sub>3</sub>O<sub>4</sub>)</p>   | <p><b>235.9515</b>    <math>\neg</math>- (+0H)</p>  <p>235.9506 (+0.9.mDa)<br/>(S:9.5, B:4)<br/>C<sub>7</sub>H<sub>3</sub>N<sub>3</sub>O<sub>3</sub>Co (-C<sub>3</sub>O<sub>5</sub>)</p>   |
| <p><b>206.0203</b>    <math>\neg</math>- (+1H)</p>  <p>206.0202 (+0.1.mDa)<br/>(S:10.5, B:4)<br/>C<sub>8</sub>H<sub>4</sub>N<sub>3</sub>O<sub>4</sub> (-C<sub>2</sub>O<sub>4</sub>Co)</p> | <p><b>206.0203</b>    <math>\neg</math>- (+1H)</p>  <p>206.0202 (+0.1.mDa)<br/>(S:11.0, B:4)<br/>C<sub>8</sub>H<sub>4</sub>N<sub>3</sub>O<sub>4</sub> (-C<sub>2</sub>O<sub>4</sub>Co)</p> | <p><b>206.0203</b>    <math>\neg</math>- (+1H)</p>  <p>206.0202 (+0.1.mDa)<br/>(S:11.0, B:4)<br/>C<sub>8</sub>H<sub>4</sub>N<sub>3</sub>O<sub>4</sub> (-C<sub>2</sub>O<sub>4</sub>Co)</p> |
| <p><b>178.0256</b>    <math>\neg</math>- (+1H)</p>                                                                                                                                                                                                                           | <p><b>177.0179</b>    <math>\neg</math>- (+0H)</p>                                                                                                                                                                                                                           | <p><b>147.0197</b>    <math>\neg</math>- (+0H)</p>                                                                                                                                                                                                                             |

|                                                                                                                                                                                                                         |                                                                                                                                                                                                                         |                                                                                                                                                                                                                           |
|-------------------------------------------------------------------------------------------------------------------------------------------------------------------------------------------------------------------------|-------------------------------------------------------------------------------------------------------------------------------------------------------------------------------------------------------------------------|---------------------------------------------------------------------------------------------------------------------------------------------------------------------------------------------------------------------------|
| 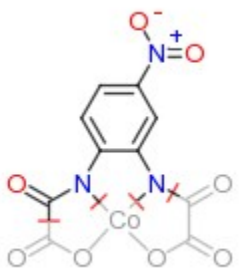 <p>178.0253 (+0.3.mDa)<br/>(S:12.0, B:4)<br/>C<sub>7</sub>H<sub>4</sub>N<sub>3</sub>O<sub>3</sub> (-C<sub>3</sub>O<sub>5</sub>Co)</p> |  <p>177.0174 (+0.5.mDa)<br/>(S:12.0, B:4)<br/>C<sub>7</sub>H<sub>3</sub>N<sub>3</sub>O<sub>3</sub> (-C<sub>3</sub>O<sub>5</sub>Co)</p> |  <p>147.0195 (+0.2.mDa)<br/>(S:6.0, B:4)<br/>C<sub>7</sub>H<sub>3</sub>N<sub>2</sub>O<sub>2</sub> (-C<sub>3</sub>NO<sub>6</sub>Co)</p> |
|-------------------------------------------------------------------------------------------------------------------------------------------------------------------------------------------------------------------------|-------------------------------------------------------------------------------------------------------------------------------------------------------------------------------------------------------------------------|---------------------------------------------------------------------------------------------------------------------------------------------------------------------------------------------------------------------------|

**Table S3.** High-resolution parent and fragment ion data for complex **3**.

|                                                                                                                                                                                                                                                                                  |                                                                                                                                                                                                                                                                                   |                                                                                                                                                                                                                                                                                     |
|----------------------------------------------------------------------------------------------------------------------------------------------------------------------------------------------------------------------------------------------------------------------------------|-----------------------------------------------------------------------------------------------------------------------------------------------------------------------------------------------------------------------------------------------------------------------------------|-------------------------------------------------------------------------------------------------------------------------------------------------------------------------------------------------------------------------------------------------------------------------------------|
| <p><b>320.9558</b>    <math>\bar{\nu}</math>- (+0H)</p> 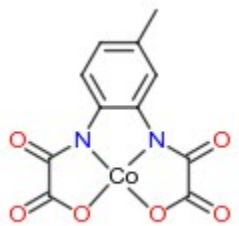 <p>320.9558 (+0.0.mDa)<br/>C<sub>11</sub>H<sub>6</sub>N<sub>2</sub>O<sub>6</sub>Co (-none)</p>                                       | <p><b>248.9711</b>    <math>\bar{\nu}</math>- (+0H)</p>  <p>248.9710 (+0.1.mDa)<br/>(S:3.0, B:2)<br/>C<sub>9</sub>H<sub>6</sub>N<sub>2</sub>O<sub>3</sub>Co (-C<sub>2</sub>O<sub>3</sub>)</p>  | <p><b>248.9711</b>    <math>\bar{\nu}</math>- (+0H)</p>  <p>248.9710 (+0.1.mDa)<br/>(S:4.0, B:3)<br/>C<sub>9</sub>H<sub>6</sub>N<sub>2</sub>O<sub>3</sub>Co (-C<sub>2</sub>O<sub>3</sub>)</p>  |
| <p><b>248.9711</b>    <math>\bar{\nu}</math>- (+0H)</p>  <p>248.9710 (+0.1.mDa)<br/>(S:7.5, B:4)<br/>C<sub>9</sub>H<sub>6</sub>N<sub>2</sub>O<sub>3</sub>Co (-C<sub>2</sub>O<sub>3</sub>)</p> | <p><b>175.0507</b>    <math>\bar{\nu}</math>- (+1H)</p>  <p>175.0508 (-0.1.mDa)<br/>(S:10.5, B:4)<br/>C<sub>9</sub>H<sub>7</sub>N<sub>2</sub>O<sub>2</sub> (-C<sub>2</sub>O<sub>4</sub>Co)</p> | <p><b>175.0507</b>    <math>\bar{\nu}</math>- (+1H)</p>  <p>175.0508 (-0.1.mDa)<br/>(S:11.0, B:4)<br/>C<sub>9</sub>H<sub>7</sub>N<sub>2</sub>O<sub>2</sub> (-C<sub>2</sub>O<sub>4</sub>Co)</p> |
| <p><b>175.0507</b>    <math>\bar{\nu}</math>- (+1H)</p>                                                                                                                                                                                                                          | <p><b>147.0550</b>    <math>\bar{\nu}</math>- (+1H)</p>                                                                                                                                                                                                                           | <p><b>147.0550</b>    <math>\bar{\nu}</math>- (+1H)</p>                                                                                                                                                                                                                             |

|                                                                                   |                                                                                   |                                                                                     |
|-----------------------------------------------------------------------------------|-----------------------------------------------------------------------------------|-------------------------------------------------------------------------------------|
| 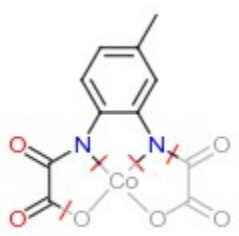 |  |  |
| 175.0508 (-0.1.mDa)<br>(S:11.0, B:4)<br>$C_9H_7N_2O_2$ (- $C_2O_4Co$ )            | 147.0558 (-0.8.mDa)<br>(S:12.0, B:4)<br>$C_8H_7N_2O$ (- $C_3O_5Co$ )              | 147.0558 (-0.8.mDa)<br>(S:12.0, B:4)<br>$C_8H_7N_2O$ (- $C_3O_5Co$ )                |

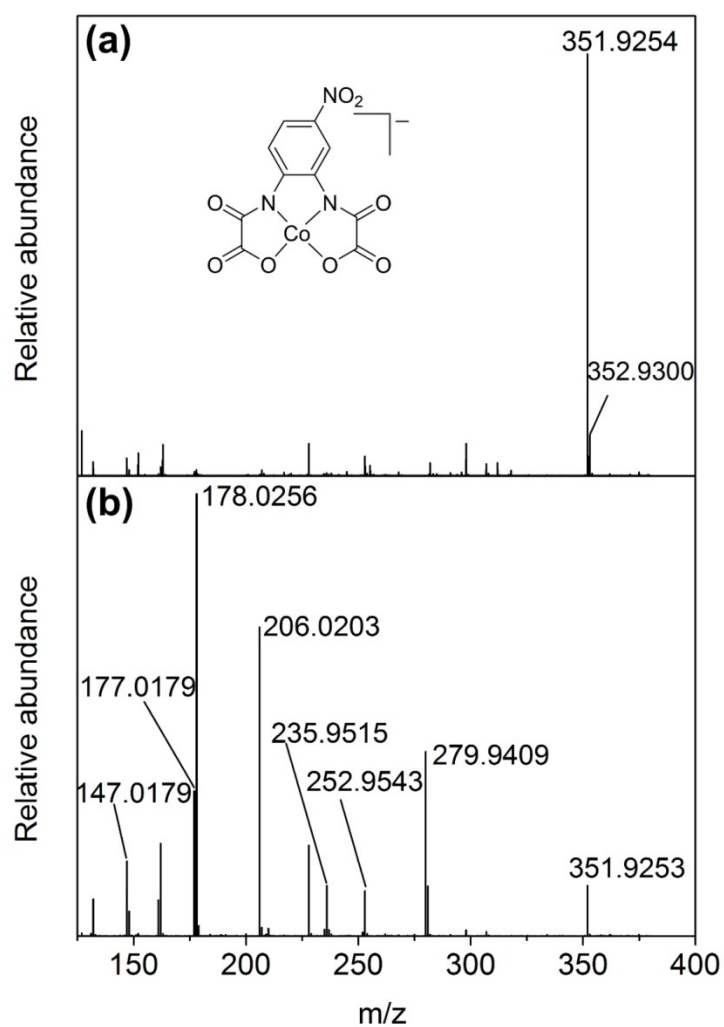

**Fig. S1.** Synapt G2-S HDMS (ESI) in negative mode of complex **2** in MeCN aqueous solution for (a) QTOF-MS and (b) MS/MS.

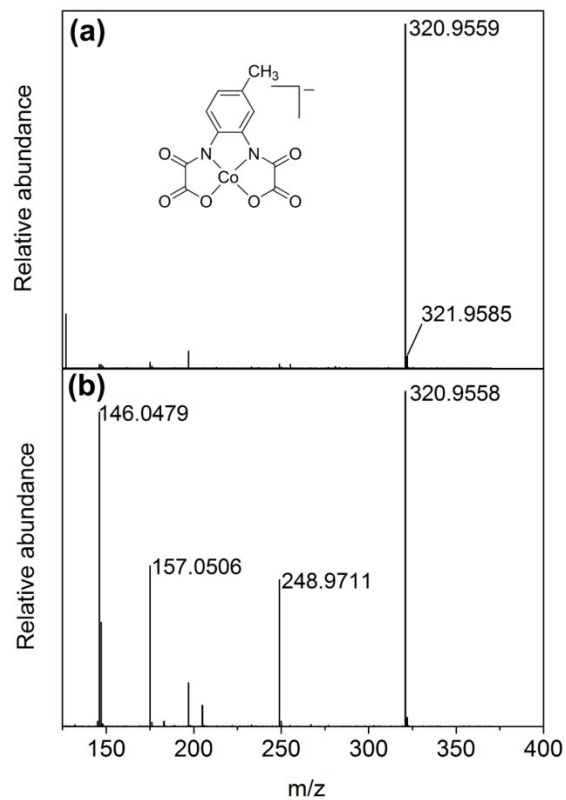

**Fig. S2.** Synapt G2-S HDMS (ESI) in negative mode of complex **3** in MeCN aqueous solution for (a) QTOF-MS and (b) MS/MS.

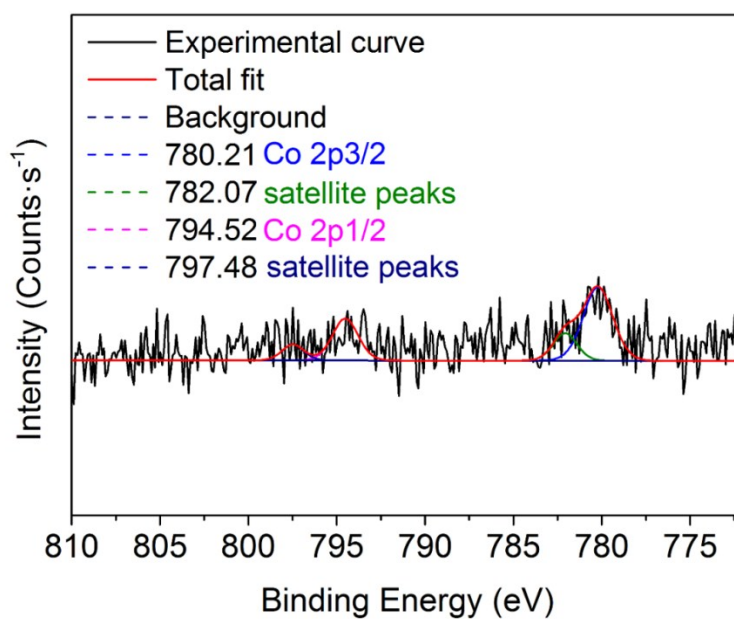

**Fig. S3.** The Co 2p spectra of the cobalt complex **1**.

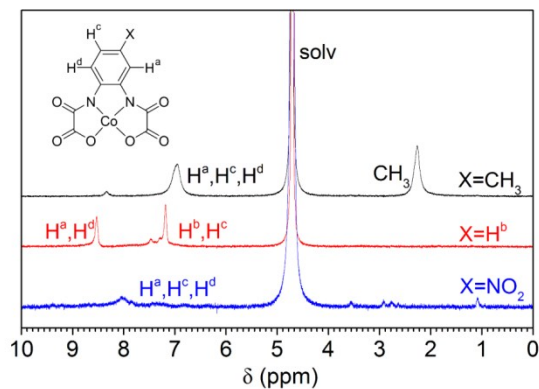

**Fig. S4.**  $^1\text{H}$  NMR spectrum of the complex **1** in  $\text{D}_2\text{O}$  at room temperature (solv=solvent, internal standard).

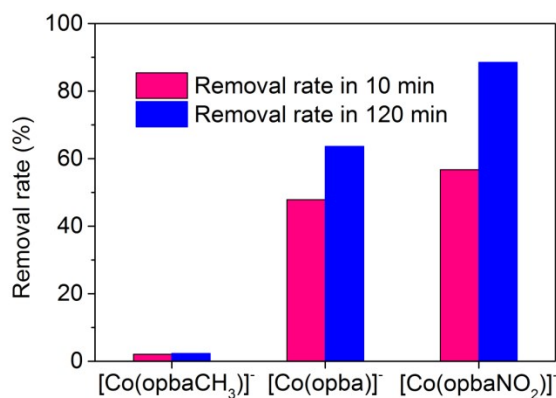

**Fig. S5.** Substitute effect of oxamate anionic cobalt(III) complexes on the removal efficiency of p-chlorophenol (0.05mM) by  $\text{H}_2\text{O}_2$  catalyzed by various cobalt(III) complexes containing a series of electron-rich and electron-poor substrates on the ligands, where the temperature is  $25\text{ }^\circ\text{C}$ , the concentration of  $[\text{Co}^{\text{III}}(\text{opbaX})]^-$  ( $\text{X}=\text{CH}_3, \text{H}, \text{NO}_2$ ) is 0.02mM, and that of  $\text{H}_2\text{O}_2$  is 40mM.

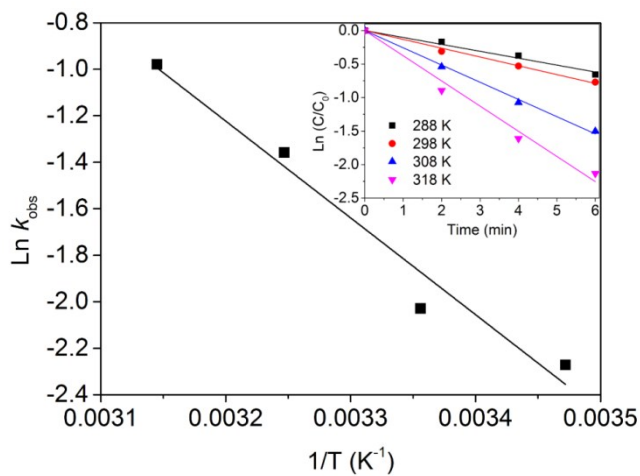

**Fig. S6.** The effect of temperature on the degradation kinetics of AR1 by complex **1** and  $\text{H}_2\text{O}_2$ ,  $T=25\text{ }^\circ\text{C}$ , pH 9.0.

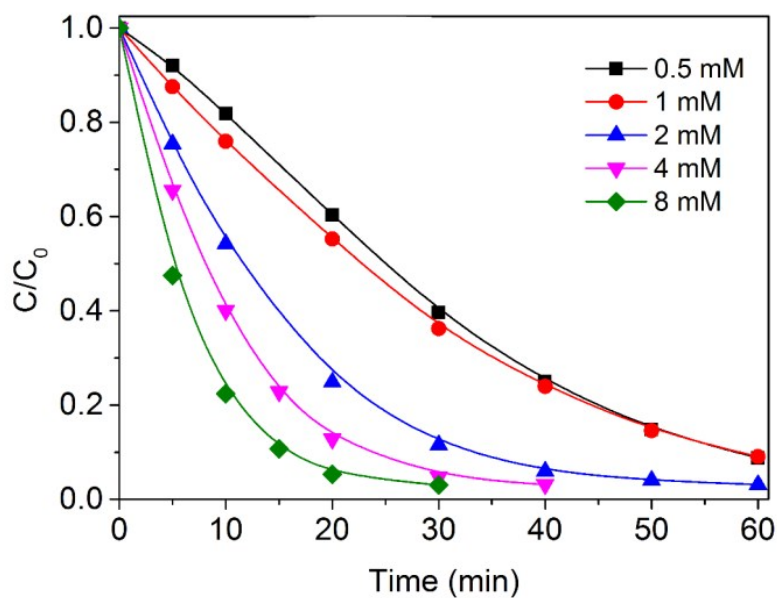

**Fig. S7.** Effect of initial  $\text{H}_2\text{O}_2$  concentration on catalyst oxidation of AR1 (0.05 mM) by complex **1** (0.02 mM) and  $\text{H}_2\text{O}_2$ ,  $T=25\text{ }^\circ\text{C}$ ,  $\text{pH } 9.0$ .

**Table S4.** The total electron spin energy of  $[\bullet\text{O}=\text{Co}^{\text{IV}}(\text{opbaCH}_3)]^-$ ,  $[\bullet\text{O}=\text{Co}^{\text{IV}}(\text{opba})]^-$  and  $[\bullet\text{O}=\text{Co}^{\text{IV}}(\text{opbaNO}_2)]^-$ .

| Total energy | $[\bullet\text{O}=\text{Co}^{\text{IV}}(\text{opbaCH}_3)]^-$<br>(a.u.) | $[\bullet\text{O}=\text{Co}^{\text{IV}}(\text{opba})]^-$<br>(a.u.) | $[\bullet\text{O}=\text{Co}^{\text{IV}}(\text{opbaNO}_2)]^-$<br>(a.u.) |
|--------------|------------------------------------------------------------------------|--------------------------------------------------------------------|------------------------------------------------------------------------|
| S=0          | -2441.28342893                                                         | -2401.97477567                                                     | -2606.40178006                                                         |
| S=1          | -2441.31674986                                                         | -2402.00879031                                                     | -2606.43523960                                                         |
| S=2          | -2441.30774637                                                         | -2401.99902687                                                     | -2606.42342433                                                         |



**Table S5.** The structure of [Co<sup>III</sup>(opba)]<sup>-</sup> calculated by DFT (S=1).

| Center Number | Atomic Number | Coordinates (Angstroms) |           |           |
|---------------|---------------|-------------------------|-----------|-----------|
|               |               | X                       | Y         | Z         |
| 1             | 6             | -0.700275               | 3.940718  | 0.000233  |
| 2             | 6             | 0.700664                | 3.940668  | 0.000275  |
| 3             | 6             | 1.419699                | 2.737082  | 0.000182  |
| 4             | 6             | 0.71118                 | 1.529754  | 0.00004   |
| 5             | 6             | -0.710961               | 1.529786  | 0.000004  |
| 6             | 6             | -1.419395               | 2.737183  | 0.000099  |
| 7             | 1             | -1.241891               | 4.882087  | 0.000303  |
| 8             | 1             | 1.242367                | 4.881989  | 0.000379  |
| 9             | 1             | 2.500907                | 2.716495  | 0.000213  |
| 10            | 1             | -2.500603               | 2.716651  | 0.00006   |
| 11            | 7             | 1.247588                | 0.222483  | -0.000038 |
| 12            | 7             | -1.247494               | 0.222645  | -0.000082 |
| 13            | 6             | 2.56823                 | -0.160101 | 0.000043  |
| 14            | 8             | 3.568136                | 0.58632   | -0.000115 |
| 15            | 6             | 2.647221                | -1.703994 | -0.000832 |
| 16            | 8             | 3.720973                | -2.311404 | 0.000675  |
| 17            | 6             | -2.568185               | -0.159865 | -0.000052 |
| 18            | 8             | -3.568019               | 0.586684  | 0.00027   |
| 19            | 6             | -2.647415               | -1.703779 | -0.000218 |
| 20            | 8             | -3.721284               | -2.310943 | 0.000516  |
| 21            | 27            | -0.000069               | -1.114212 | -0.000209 |
| 22            | 8             | -1.428641               | -2.297395 | -0.00008  |
| 23            | 8             | 1.428317                | -2.297525 | -0.000405 |

**Table S6.** Mulliken spin densities of [Co<sup>III</sup>(opba)]<sup>-</sup> (S=1).

| Center Number | Atomic Number | density   |
|---------------|---------------|-----------|
| 1             | C             | 0.006637  |
| 2             | C             | 0.006657  |
| 3             | C             | 0.008147  |
| 4             | C             | 0.000867  |
| 5             | C             | 0.000846  |
| 6             | C             | 0.008166  |
| 7             | H             | -0.000587 |
| 8             | H             | -0.000588 |
| 9             | H             | -0.000529 |
| 10            | H             | -0.00053  |
| 11            | N             | 0.005209  |
| 12            | N             | 0.00523   |

|    |    |           |
|----|----|-----------|
| 13 | C  | 0.000107  |
| 14 | O  | 0.049417  |
| 15 | C  | -0.006278 |
| 16 | O  | 0.014033  |
| 17 | C  | 0.000103  |
| 18 | O  | 0.04942   |
| 19 | C  | -0.006274 |
| 20 | O  | 0.01403   |
| 21 | Co | 1.816417  |
| 22 | O  | 0.014742  |
| 23 | O  | 0.014758  |

**Table S7.** The structure of [ $\bullet\text{O}=\text{Co}^{\text{IV}}(\text{opba})$ ] $^-$  calculated by DFT (S=1).

| Center Number | Atomic Number | Coordinates (Angstroms) |          |          |
|---------------|---------------|-------------------------|----------|----------|
|               |               | X                       | Y        | Z        |
| 1             | C             | 0.701462                | 3.995124 | 0.002592 |
| 2             | C             | -0.70514                | 3.994514 | 0.002841 |
| 3             | C             | -1.42511                | 2.797443 | 0.000404 |
| 4             | C             | -0.71323                | 1.586533 | -0.00217 |
| 5             | C             | 0.711659                | 1.587163 | -0.00252 |
| 6             | C             | 1.42247                 | 2.798674 | -0.00016 |
| 7             | H             | 1.238953                | 4.9385   | 0.004479 |
| 8             | H             | -1.24344                | 4.93743  | 0.004888 |
| 9             | H             | -2.50587                | 2.777856 | -0.01237 |
| 10            | H             | 2.503239                | 2.780088 | -0.01346 |
| 11            | N             | -1.23389                | 0.289901 | -0.03895 |
| 12            | N             | 1.233341                | 0.290887 | -0.03984 |
| 13            | C             | -2.54238                | -0.10609 | -0.22321 |
| 14            | O             | -3.5264                 | 0.64641  | -0.35761 |
| 15            | C             | -2.6062                 | -1.64218 | -0.30658 |
| 16            | O             | -3.66662                | -2.24644 | -0.50558 |
| 17            | C             | 2.54234                 | -0.10382 | -0.22362 |
| 18            | O             | 3.525459                | 0.649698 | -0.35885 |
| 19            | C             | 2.607932                | -1.63989 | -0.30581 |
| 20            | O             | 3.66911                 | -2.24297 | -0.5044  |
| 21            | Co            | 0.000501                | -1.04842 | 0.305524 |
| 22            | O             | 1.404347                | -2.2245  | -0.18733 |
| 23            | O             | -1.40182                | -2.22541 | -0.18901 |
| 24            | O             | 0.000255                | -1.20639 | 1.936327 |

**Table S8.** The structure of [ $\bullet\text{O}=\text{Co}^{\text{IV}}(\text{opbaCH}_3)\text{]}^-$  calculated by DFT (S=1).

| Center Number | Atomic Number | Coordinates (Angstroms) |             |             |
|---------------|---------------|-------------------------|-------------|-------------|
|               |               | X                       | Y           | Z           |
| 1             | C             | -3.73973542             | -0.68786101 | -0.00110193 |
| 2             | C             | -3.23564573             | -2.00907665 | -0.00349168 |
| 3             | C             | -1.86751676             | -2.27646976 | -0.00464854 |
| 4             | C             | -0.96975391             | -1.19539593 | -0.00452562 |
| 5             | C             | -1.46330828             | 0.14020774  | -0.00358425 |
| 6             | C             | -2.84570212             | 0.38950046  | -0.00250968 |
| 7             | H             | -3.93528595             | -2.84085698 | -0.00512715 |
| 8             | H             | -1.48245576             | -3.286553   | -0.0201308  |
| 9             | H             | -3.19697002             | 1.41255332  | -0.01547311 |
| 10            | N             | 0.42507853              | -1.23805507 | -0.04132501 |
| 11            | N             | -0.42841352             | 1.07730724  | -0.03865215 |
| 12            | C             | 1.24731216              | -2.3309564  | -0.22537856 |
| 13            | O             | 0.87733856              | -3.51289668 | -0.36294158 |
| 14            | C             | 2.71221241              | -1.8626524  | -0.30454382 |
| 15            | O             | 3.64337573              | -2.65210727 | -0.5042123  |
| 16            | C             | -0.50894704             | 2.44204259  | -0.22473652 |
| 17            | O             | -1.55522276             | 3.10522437  | -0.36026169 |
| 18            | C             | 0.91092754              | 3.03271129  | -0.31001981 |
| 19            | O             | 1.10926443              | 4.23692721  | -0.51159441 |
| 20            | Co            | 1.25566233              | 0.38117757  | 0.30870277  |
| 21            | O             | 1.87430819              | 2.10543209  | -0.19080587 |
| 22            | O             | 2.84624852              | -0.5325271  | -0.18180823 |
| 23            | O             | 1.40250331              | 0.43924824  | 1.94287797  |
| 24            | C             | -5.23361                | -0.44461065 | 0.01193209  |
| 25            | H             | -5.73489319             | -0.981673   | -0.80367615 |
| 26            | H             | -5.46208078             | 0.62013643  | -0.09623464 |
| 27            | H             | -5.68777699             | -0.78920883 | 0.95112597  |

**Table S9.** The structure of [ $\bullet\text{O}=\text{Co}^{\text{IV}}(\text{opbaNO}_2)\text{]}^-$  calculated by DFT (S=1).

| Center Number | Atomic Number | Coordinates (Angstroms) |             |             |
|---------------|---------------|-------------------------|-------------|-------------|
|               |               | X                       | Y           | Z           |
| 1             | C             | -3.29653114             | -0.49054248 | -0.00275171 |
| 2             | C             | -2.90704272             | -1.83976583 | -0.00624603 |
| 3             | C             | -1.5551274              | -2.16852088 | -0.00700361 |
| 4             | C             | -0.60365043             | -1.13207088 | -0.00163718 |
| 5             | C             | -1.01950591             | 0.23389776  | -0.00127994 |
| 6             | C             | -2.37708009             | 0.56438477  | -0.00245955 |
| 7             | H             | -3.66923583             | -2.60686401 | -0.00747386 |

|    |    |             |             |             |
|----|----|-------------|-------------|-------------|
| 8  | H  | -1.22189673 | -3.19623819 | -0.02117705 |
| 9  | H  | -2.70280987 | 1.59369925  | -0.01680289 |
| 10 | N  | 0.78108698  | -1.2550603  | -0.03156334 |
| 11 | N  | 0.0699159   | 1.10996637  | -0.03911146 |
| 12 | C  | 1.54267919  | -2.3944824  | -0.21085645 |
| 13 | O  | 1.1094984   | -3.55409686 | -0.33111465 |
| 14 | C  | 3.02824523  | -2.00365375 | -0.30615031 |
| 15 | O  | 3.91803364  | -2.83661151 | -0.50254928 |
| 16 | C  | 0.06575035  | 2.47896492  | -0.22016018 |
| 17 | O  | -0.94119526 | 3.19653244  | -0.35272199 |
| 18 | C  | 1.51633076  | 2.98539062  | -0.29810832 |
| 19 | O  | 1.7951201   | 4.17166266  | -0.49298266 |
| 20 | Co | 1.70774455  | 0.32101237  | 0.29622914  |
| 21 | O  | 2.42506626  | 1.99649535  | -0.18061879 |
| 22 | O  | 3.23084555  | -0.67610923 | -0.2034469  |
| 23 | O  | 1.85625635  | 0.35201193  | 1.91917227  |
| 24 | N  | -4.71819923 | -0.17742536 | 0.00038882  |
| 25 | O  | -5.07150174 | 1.03973091  | 0.01180856  |
| 26 | O  | -5.54827243 | -1.13985407 | -0.00764798 |

**Table S10.** Mulliken spin densities of [ $\bullet\text{O}=\text{Co}^{\text{IV}}(\text{opba})$ ] $^-$  (S=1).

| Center Number | Atomic Number | density   |
|---------------|---------------|-----------|
| 1             | C             | -0.017188 |
| 2             | C             | -0.017268 |
| 3             | C             | 0.001146  |
| 4             | C             | -0.018543 |
| 5             | C             | -0.018463 |
| 6             | C             | 0.00108   |
| 7             | H             | 0.000914  |
| 8             | H             | 0.000917  |
| 9             | H             | 0.000199  |
| 10            | H             | 0.000201  |
| 11            | N             | -0.048369 |
| 12            | N             | -0.048377 |
| 13            | C             | 0.011299  |
| 14            | O             | -0.037603 |
| 15            | C             | 0.000093  |
| 16            | O             | -0.003415 |
| 17            | C             | 0.011327  |
| 18            | O             | -0.037606 |
| 19            | C             | 0.000084  |
| 20            | O             | -0.003426 |

|    |    |          |
|----|----|----------|
| 21 | Co | 1.244726 |
| 22 | O  | 0.026031 |
| 23 | O  | 0.026217 |
| 24 | O  | 0.926025 |

**Table S11.** Mulliken spin densities of [ $\bullet\text{O}=\text{Co}^{\text{IV}}(\text{opbaCH}_3)$ ] $^-$  (S=1).

| Center Number | Atomic Number | density   |
|---------------|---------------|-----------|
| 1             | C             | -0.022771 |
| 2             | C             | -0.024299 |
| 3             | C             | 0.001909  |
| 4             | C             | -0.025985 |
| 5             | C             | -0.022891 |
| 6             | C             | 0.005978  |
| 7             | H             | 0.001215  |
| 8             | H             | 0.000248  |
| 9             | H             | 0.000071  |
| 10            | N             | -0.060499 |
| 11            | N             | -0.057163 |
| 12            | C             | 0.013261  |
| 13            | O             | -0.046033 |
| 14            | C             | 0.000186  |
| 15            | O             | -0.00345  |
| 16            | C             | 0.01266   |
| 17            | O             | -0.042948 |
| 18            | C             | 0.00012   |
| 19            | O             | -0.002937 |
| 20            | Co            | 1.284437  |
| 21            | O             | 0.024963  |
| 22            | O             | 0.023876  |
| 23            | O             | 0.940231  |
| 24            | C             | 0.001978  |
| 25            | H             | -0.000783 |
| 26            | H             | -0.00005  |
| 27            | H             | -0.001324 |

**Table S12.** Mulliken spin densities of [ $\bullet\text{O}=\text{Co}^{\text{IV}}(\text{opbaNO}_2)$ ] $^-$  (S=1).

| Center Number | Atomic Number | density   |
|---------------|---------------|-----------|
| 1             | C             | -0.005699 |
| 2             | C             | -0.003526 |

|    |    |           |
|----|----|-----------|
| 3  | C  | -0.000164 |
| 4  | C  | -0.004122 |
| 5  | C  | -0.00545  |
| 6  | C  | -0.005774 |
| 7  | H  | 0.000223  |
| 8  | H  | 0.000066  |
| 9  | H  | 0.000244  |
| 10 | N  | -0.014642 |
| 11 | N  | -0.021156 |
| 12 | C  | 0.005355  |
| 13 | O  | -0.016278 |
| 14 | C  | 0.000073  |
| 15 | O  | -0.003468 |
| 16 | C  | 0.007312  |
| 17 | O  | -0.020575 |
| 18 | C  | 0.000325  |
| 19 | O  | -0.004811 |
| 20 | Co | 1.130697  |
| 21 | O  | 0.027168  |
| 22 | O  | 0.030516  |
| 23 | O  | 0.906423  |
| 24 | N  | 0.000726  |
| 25 | O  | 0.000058  |
| 26 | O  | -0.003522 |

**Table S13.** The total electron spin energy of HO–Co<sup>III</sup>(opbaCH<sub>3</sub>)•, HO–Co<sup>III</sup>(opba)• and HO–Co<sup>III</sup>(opbaNO<sub>2</sub>)•.

| Total energy | HO–Co <sup>III</sup> (opbaCH <sub>3</sub> )•<br>(a.u.) | HO–Co <sup>III</sup> (opba)•<br>(a.u.) | HO–Co <sup>III</sup> (opbaNO <sub>2</sub> )•<br>(a.u.) |
|--------------|--------------------------------------------------------|----------------------------------------|--------------------------------------------------------|
| S=0          | -2441.78671069                                         | -2402.47353885                         | -2606.87669333                                         |
| S=1          | -2441.80261400                                         | -2402.49020651                         | -2606.88366260                                         |
| S=2          | -2441.79370375                                         | -2402.48109935                         | -2606.88609619                                         |

**Table S14.** Mulliken spin densities of HO–Co<sup>III</sup>(opbaNO<sub>2</sub>)• (S=2).

| Center Number | Atomic Number | density   |
|---------------|---------------|-----------|
| 1             | C             | 0.092813  |
| 2             | C             | 0.116385  |
| 3             | C             | -0.047266 |
| 4             | C             | 0.138211  |

|    |    |           |
|----|----|-----------|
| 5  | C  | 0.155262  |
| 6  | C  | 0.017176  |
| 7  | H  | -0.005066 |
| 8  | H  | 0.000526  |
| 9  | H  | -0.001488 |
| 10 | N  | 0.142102  |
| 11 | N  | 0.207607  |
| 12 | C  | -0.031422 |
| 13 | O  | 0.10779   |
| 14 | C  | -0.006757 |
| 15 | O  | 0.00377   |
| 16 | C  | -0.046056 |
| 17 | O  | 0.141434  |
| 18 | C  | -0.006579 |
| 19 | O  | 0.004353  |
| 20 | Co | 2.273277  |
| 21 | O  | 0.100559  |
| 22 | O  | 0.086938  |
| 23 | O  | 0.534305  |
| 24 | N  | -0.013619 |
| 25 | O  | -0.021493 |
| 26 | O  | 0.05066   |
| 27 | H  | 0.006577  |

**Table S15.** Mulliken spin densities of HO–Co<sup>III</sup>(opba)• (S=1).

| Center Number | Atomic Number | density   |
|---------------|---------------|-----------|
| 1             | C             | -0.120116 |
| 2             | C             | -0.120118 |
| 3             | C             | 0.049756  |
| 4             | C             | -0.158409 |
| 5             | C             | -0.158366 |
| 6             | C             | 0.049744  |
| 7             | H             | 0.005726  |
| 8             | H             | 0.005726  |
| 9             | H             | -0.000683 |
| 10            | H             | -0.000683 |
| 11            | N             | -0.12719  |
| 12            | N             | -0.127107 |
| 13            | C             | 0.031807  |
| 14            | O             | -0.0741   |
| 15            | C             | -0.013013 |
| 16            | O             | 0.022934  |

|    |    |           |
|----|----|-----------|
| 17 | C  | 0.031836  |
| 18 | O  | -0.074141 |
| 19 | C  | -0.013015 |
| 20 | O  | 0.022881  |
| 21 | Co | 2.152981  |
| 22 | O  | 0.062174  |
| 23 | O  | 0.062503  |
| 24 | O  | 0.486382  |
| 25 | H  | 0.002489  |

**Table S16.** Mulliken spin densities of HO–Co<sup>III</sup>(opbaCH<sub>3</sub>)• (S=1).

| Center Number | Atomic Number | density   |
|---------------|---------------|-----------|
| 1             | C             | -0.141564 |
| 2             | C             | -0.128656 |
| 3             | C             | 0.048066  |
| 4             | C             | -0.177364 |
| 5             | C             | -0.149817 |
| 6             | C             | 0.076466  |
| 7             | H             | 0.005969  |
| 8             | H             | -0.000517 |
| 9             | H             | -0.001616 |
| 10            | N             | -0.127819 |
| 11            | N             | -0.099952 |
| 12            | C             | 0.030782  |
| 13            | O             | -0.07712  |
| 14            | C             | -0.012522 |
| 15            | O             | 0.022774  |
| 16            | C             | 0.025969  |
| 17            | O             | -0.060269 |
| 18            | C             | -0.01247  |
| 19            | O             | 0.022413  |
| 20            | Co            | 2.154454  |
| 21            | O             | 0.061888  |
| 22            | O             | 0.0603    |
| 23            | O             | 0.48371   |
| 24            | C             | 0.009941  |
| 25            | H             | -0.007635 |
| 26            | H             | 0.000062  |
| 27            | H             | -0.007882 |
| 28            | H             | 0.002409  |
